# Supplementary material for: A chloroplast genomic strategy for designing taxon specific DNA mini-barcodes: a case study on ginsengs
Source: PubMed Central journal article supplement (PMC4293818; doi:10.1186/s12863-014-0138-z), 2014-12-20

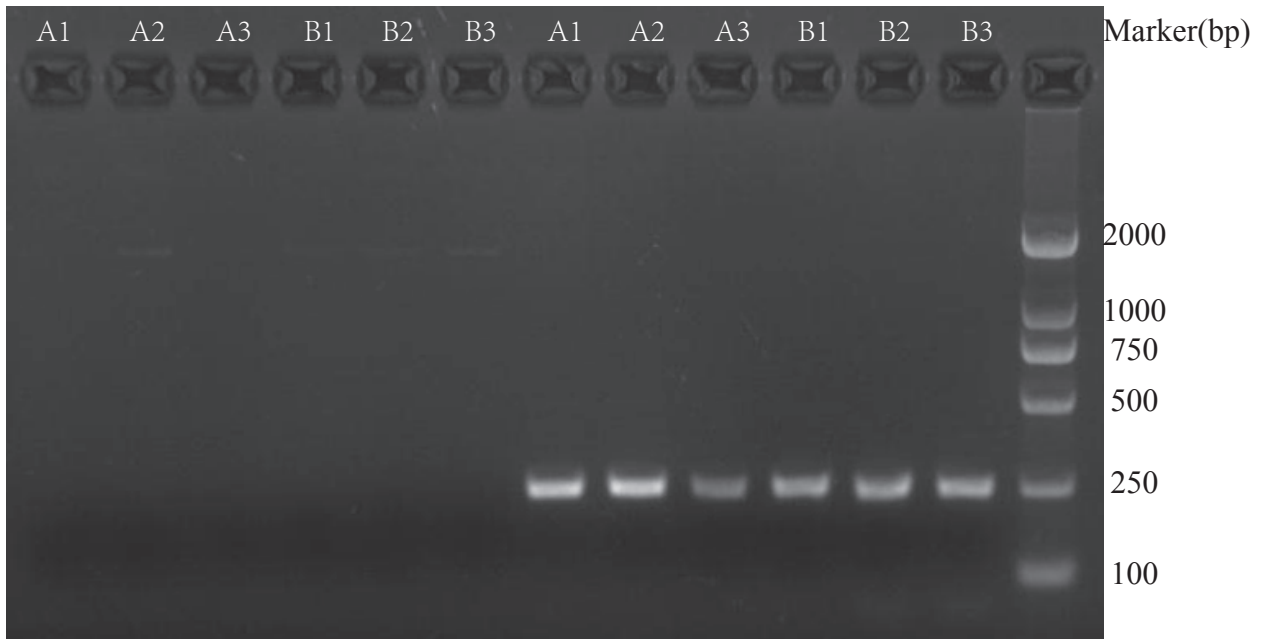

Supplement: 12863_2014_138_MOESM5_ESM.pdf [file 12863_2014_138_MOESM5_ESM.pdf]
